# Supplementary material for: Substitution (CH3, Cl, or Br) effects of the imidazolate linker on benzene adsorption kinetics for the zeolitic imidazolate framework (ZIF)-8
Source: Royal Society of Chemistry journal article supplement (doi:10.1039/d3cp01662e), 2023-01-01
Supplement: d3cp01662e1.pdf [file d3cp01662e1.pdf]

Electronic Supplementary Information (ESI)

## **Substitution (CH<sub>3</sub>, Cl, or Br) effects of the Imidazolate Linker on Benzene Adsorption kinetics for Zeolitic Imidazolate Framework (ZIF)-8**

Ryohei Yagi<sup>a</sup>, Takahiro Ueda<sup>\*a,b</sup>

<sup>a</sup>*Department of Chemistry, Graduate School of Science, Osaka University, Toyonaka, Osaka 560-0043, Japan.*

<sup>b</sup>*The Museum of Osaka University, Osaka University, Toyonaka, Osaka 560-0043, Japan.*

### **Contents:**

#### **1. Figures for Supplementary Information**

The lists of Figures;

- Figure S1. Thermogravimetry and differential thermal analysis diagrams.
- Figure S2. Nitrogen adsorption isotherms of X-ZIF-8.
- Figure S3. Powder X-ray diffraction (PXRD) patterns of X-ZIF-8.
- Figure S4. The SEM images of X-ZIF-8.
- Figure S5. Size distribution of the crystallites of X-ZIF-8.
- Figure S6. Comparison of the data optimization of a surface barrier model and an intra-crystalline (Fick) diffusion model.
- Figure S7. The typical example of the model structure for a 6-membered ring aperture in the case of ZIF-8
- Figure S8. The typical examples of the stable configuration of a benzene molecule adsorbed on a 6-membered ring aperture of X-ZIF-8.
- Figure S9. Arrhenius plot of the adsorption rate constant.
- Figure S10. Infrared spectra of X-ZIF-8.
- Figure S11. The results of the deconvolution of the <sup>13</sup>C-NMR resonance peaks.

#### **2. Tables for Supplementary Information**

Lists of Tables;

- Table S1. BET surface area and pore volume for ZIF-8 and X-ZIF-8.
- Table S2. Average particle size of ZIF-8 and X-ZIF-8.
- Table S3. Desorption amount of benzene from ZIF-8 and X-ZIF-8 after saturation of adsorption.
- Table S4. Results of the non-linear least-squares data fitting for Arrhenius plot of the adsorption rate constant.
- Table S5. Band assignment of IR spectrum of ZIF-8 before and after benzene adsorption.
- Table S6. Band assignment of IR spectrum of Cl-ZIF-8 before and after benzene adsorption.

- Table S7. Band assignment of IR spectrum of Br-ZIF-8 before and after benzene adsorption.
- Table S8. Band assignment of IR spectrum of benzene in bulk liquid and in X-ZIF-8.
- Table S9. The parameters characterizing the  $^{13}\text{C}$  NMR resonance lines in ZIF-8 and ZIF-8/ $\text{C}_6\text{H}_6$ .
- Table S10. The parameters characterizing the  $^{13}\text{C}$  NMR resonance lines in Cl-ZIF-8 and Cl-ZIF-8/ $\text{C}_6\text{H}_6$ .
- Table S11. The parameters characterizing the  $^{13}\text{C}$  NMR resonance lines in Br-ZIF-8 and Br-ZIF-8/ $\text{C}_6\text{H}_6$ .

### **3. Evaluation of activation entropy of benzene trapped by 6-membered ring aperture**

### **4. $^{13}\text{C}$ - $^{14}\text{N}$ and $^{13}\text{C}$ - $^{79/81}\text{Br}$ residual dipolar splitting**

## 1. Figures for Supplementary Information

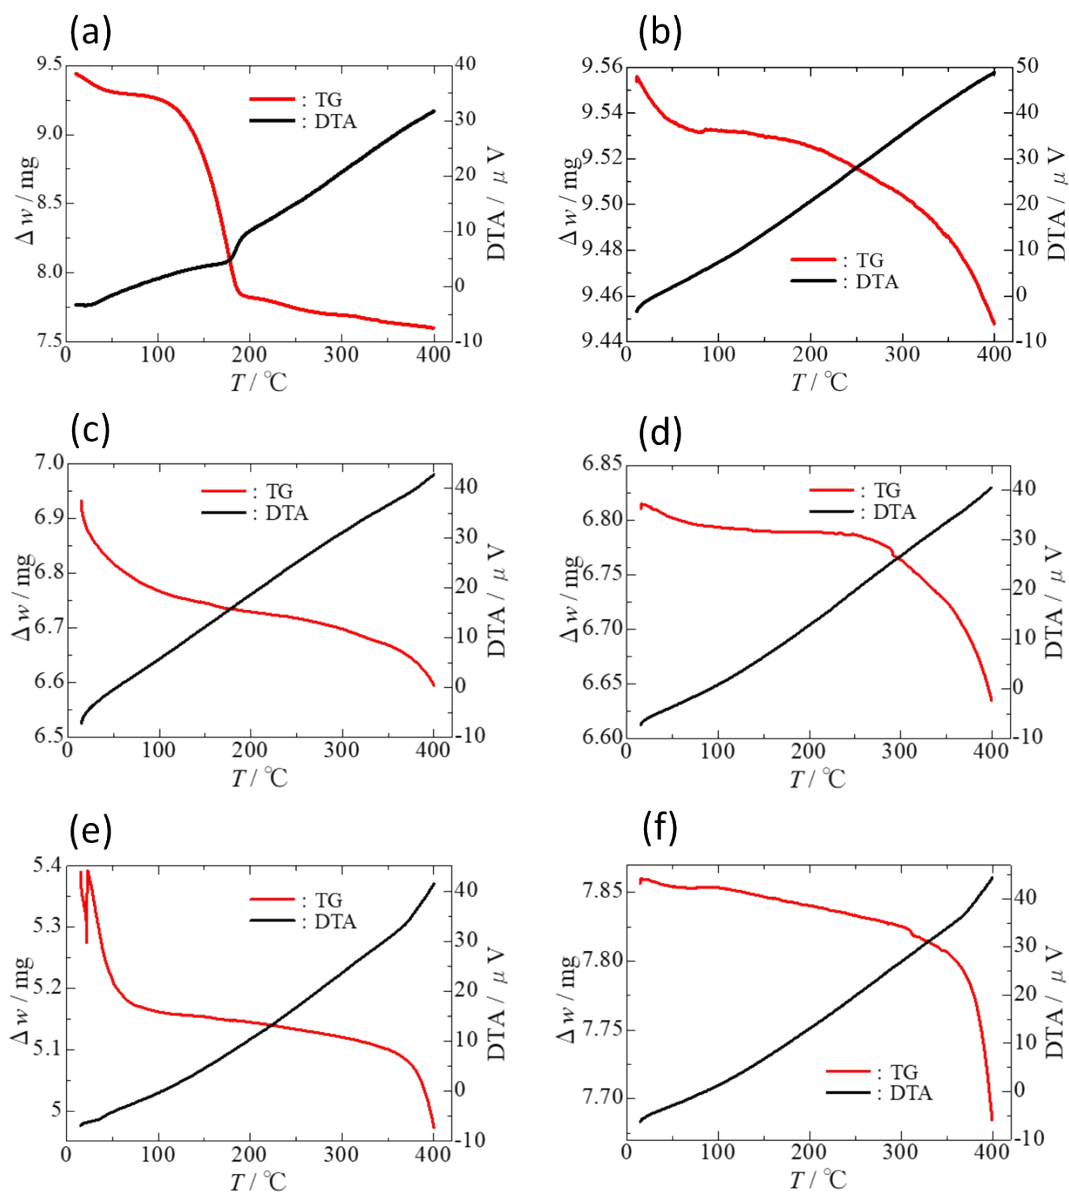

Figure S1. Thermogravimetry and differential thermal analysis diagrams; as-synthesized specimen of ZIF-8 (a), Cl-ZIF-8 (c) and Br-ZIF-8 (e), and pretreated specimen of ZIF-8 (b), Cl-ZIF-8 (d) and Br-ZIF-8 (f).

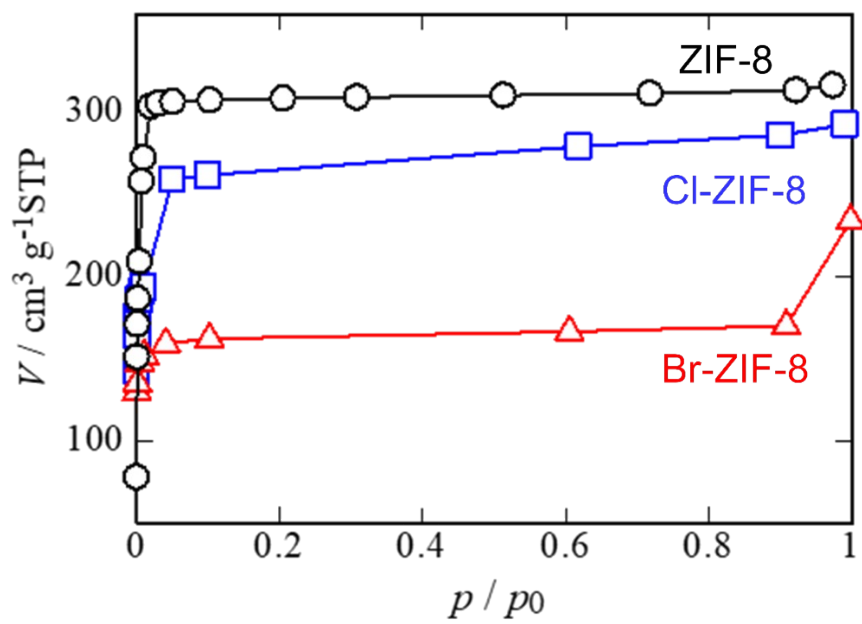

Figure S2. Nitrogen adsorption isotherms of ZIF-8 (○), Cl-ZIF-8 (●), and Br-ZIF-8 (□).

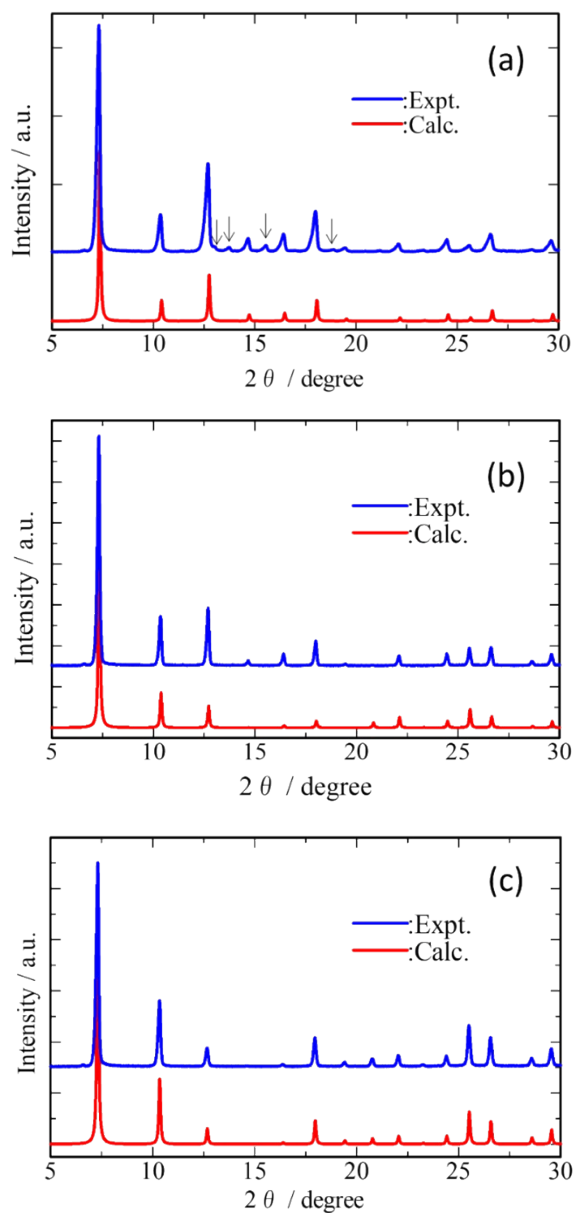

Figure S3. Powder X-ray diffraction (PXRD) patterns of ZIF-8 (a), Cl-ZIF-8 (b), and Br-ZIF-8 (c). The experimental powder patterns are in agreement with the calculated ones. In ZIF-8, the reflections denoted by arrows correspond to a trace amount of the by-product of  $\text{Zn}_5(\text{OH})_8(\text{NO}_3)_2$ .

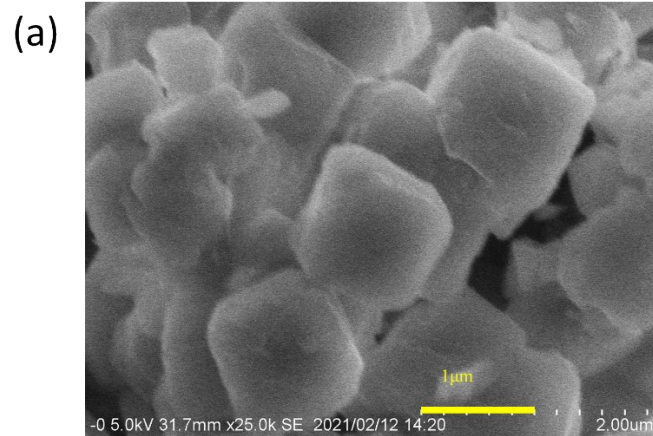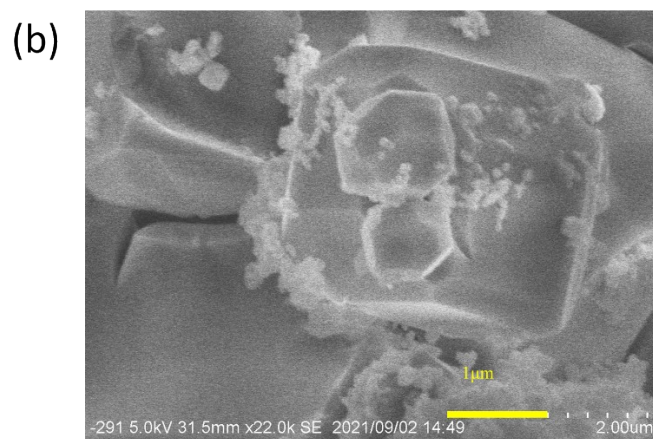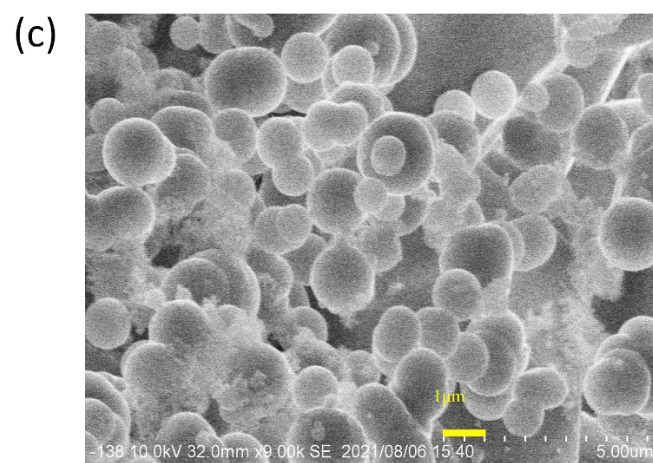

Figure S4. The SEM images of ZIF-8 (a), Cl-ZIF-8 (b), and Br-ZIF-8 (c).

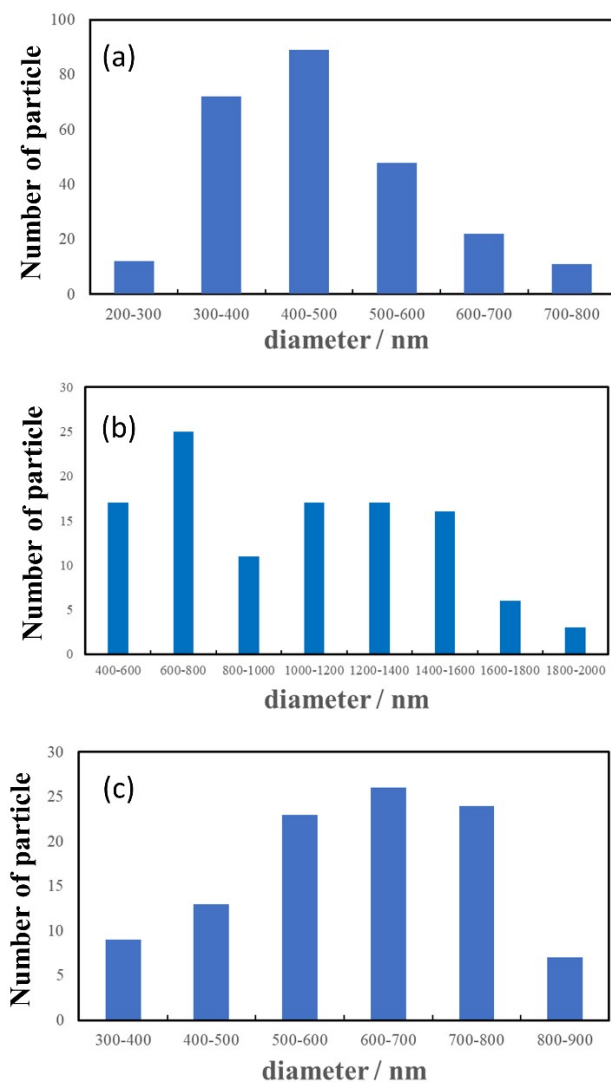

Figure S5. Size distribution of the crystallites determined from the SEM image; ZIF-8 (a), Cl-ZIF-8 (b), and Br-ZIF-8 (c). The average particle radii of  $r_{ave}$  are listed in Table S2.

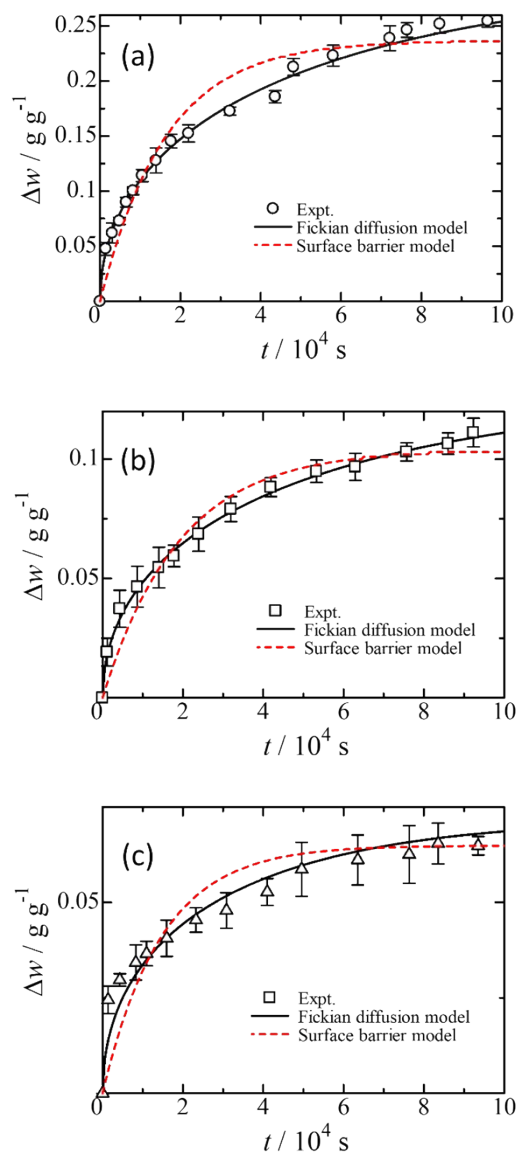

Figure S6. Comparison of the optimization of a surface barrier model and an intra-crystalline (Fick) diffusion model to the experimental data of the time dependence of the benzene uptake; ZIF-8 (a), Cl-ZIF-8 (b), and Br-ZIF-8 (c).



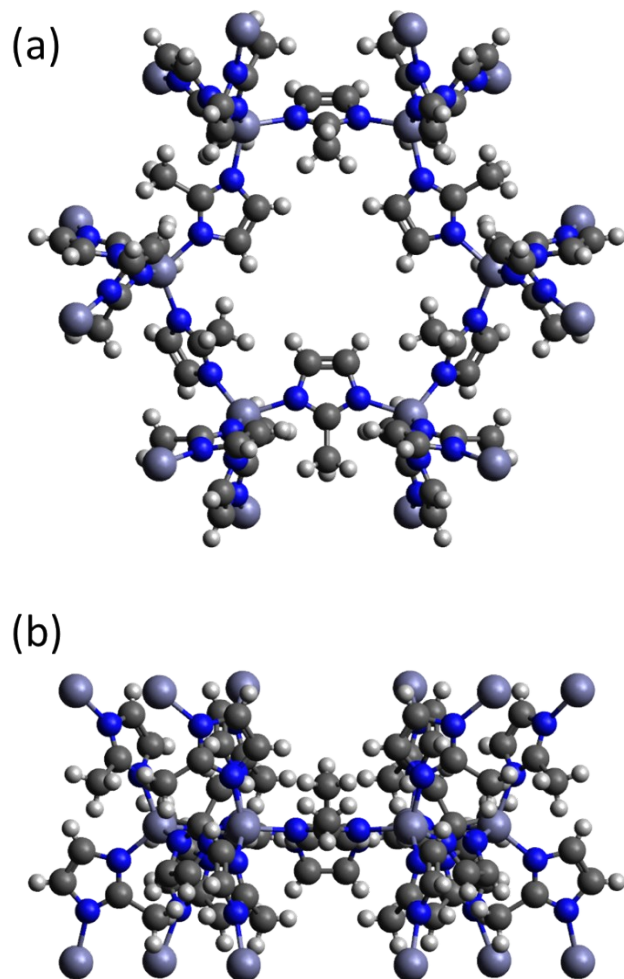

Figure S7. The typical example of the model structure for a 6-membered ring aperture in the case of ZIF-8; the vertical view of the aperture (a) and the horizontal view of the aperture (b). This structure of the 6-membered ring aperture is extracted from the crystal structure of ZIF-8. The zinc, carbon, nitrogen, and hydrogen atoms are colored by dark blue, gray, blue, and white, respectively.

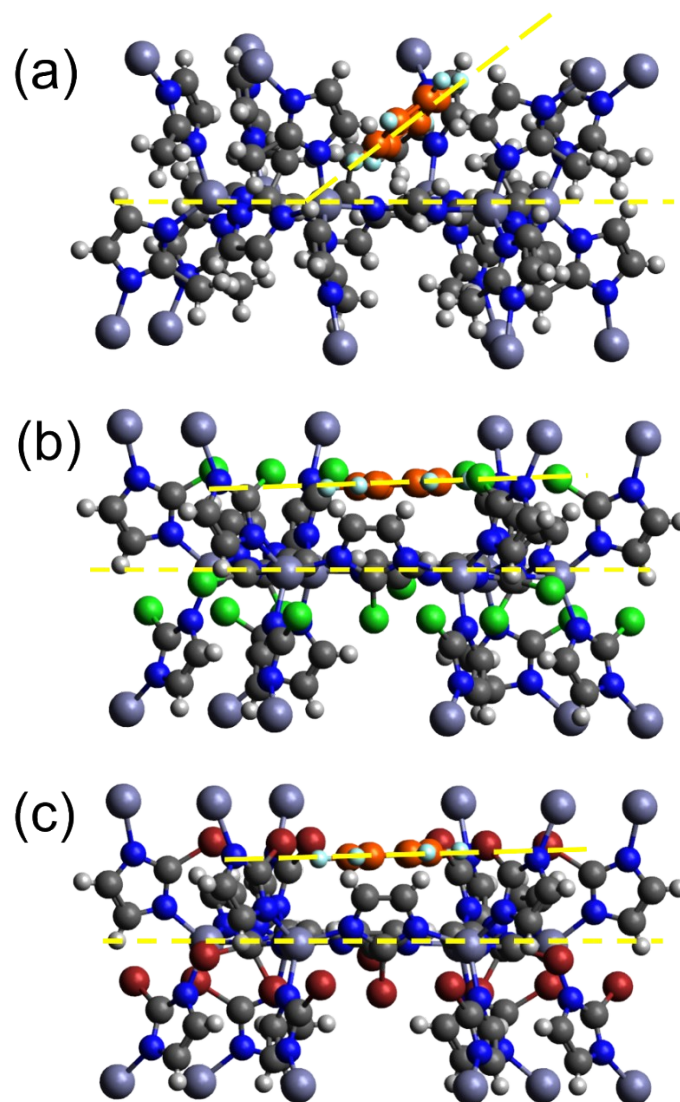

Figure S8. The typical example of the stable configuration of a benzene molecule adsorbed on a 6-membered ring aperture; ZIF-8 (a), Cl-ZIF-8 (b), and Br-ZIF-8 (c). These configurations were obtained by molecular mechanics calculation using Avogadro software. The carbon atoms and the hydrogen atoms in benzene molecules are displayed in orange and cyan balls, respectively. In the 6-membered ring aperture, the zinc, carbon, nitrogen, and hydrogen atoms are colored by dark blue, gray, blue, and white, respectively. The yellow dashed lines are guides to the eye to show the tilting angle between the benzene molecular plane and the aperture plane.

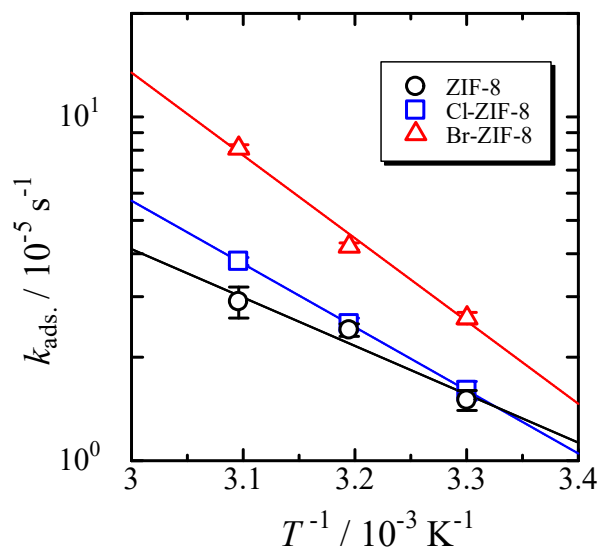

Figure S9. Arrhenius plot of the adsorption rate constant. The solid lines are the results of the optimization of Arrhenius law to the data using the least squares method. The parameters obtained are listed in Table S4.

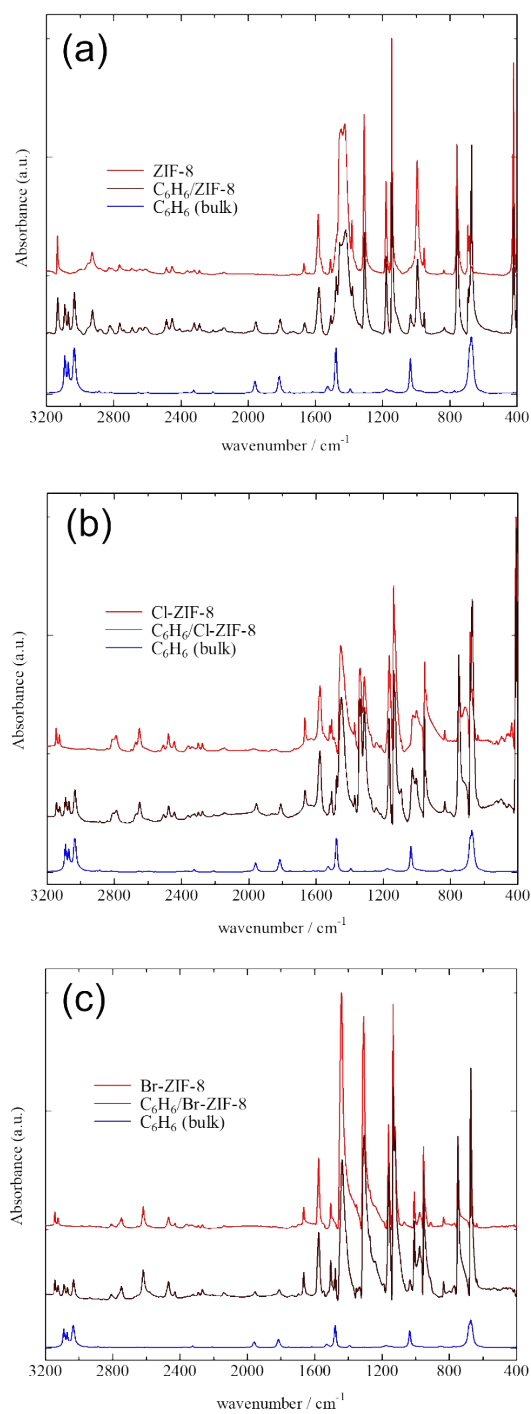

Figure S10. Infrared spectra of ZIF-8 (a), Cl-ZIF-8 (b), and Br-ZIF-8 (b) before and after benzene adsorption, in addition to the spectrum of bulk benzene, in the wavenumber range from 400  $\text{cm}^{-1}$  to 3200  $\text{cm}^{-1}$ .

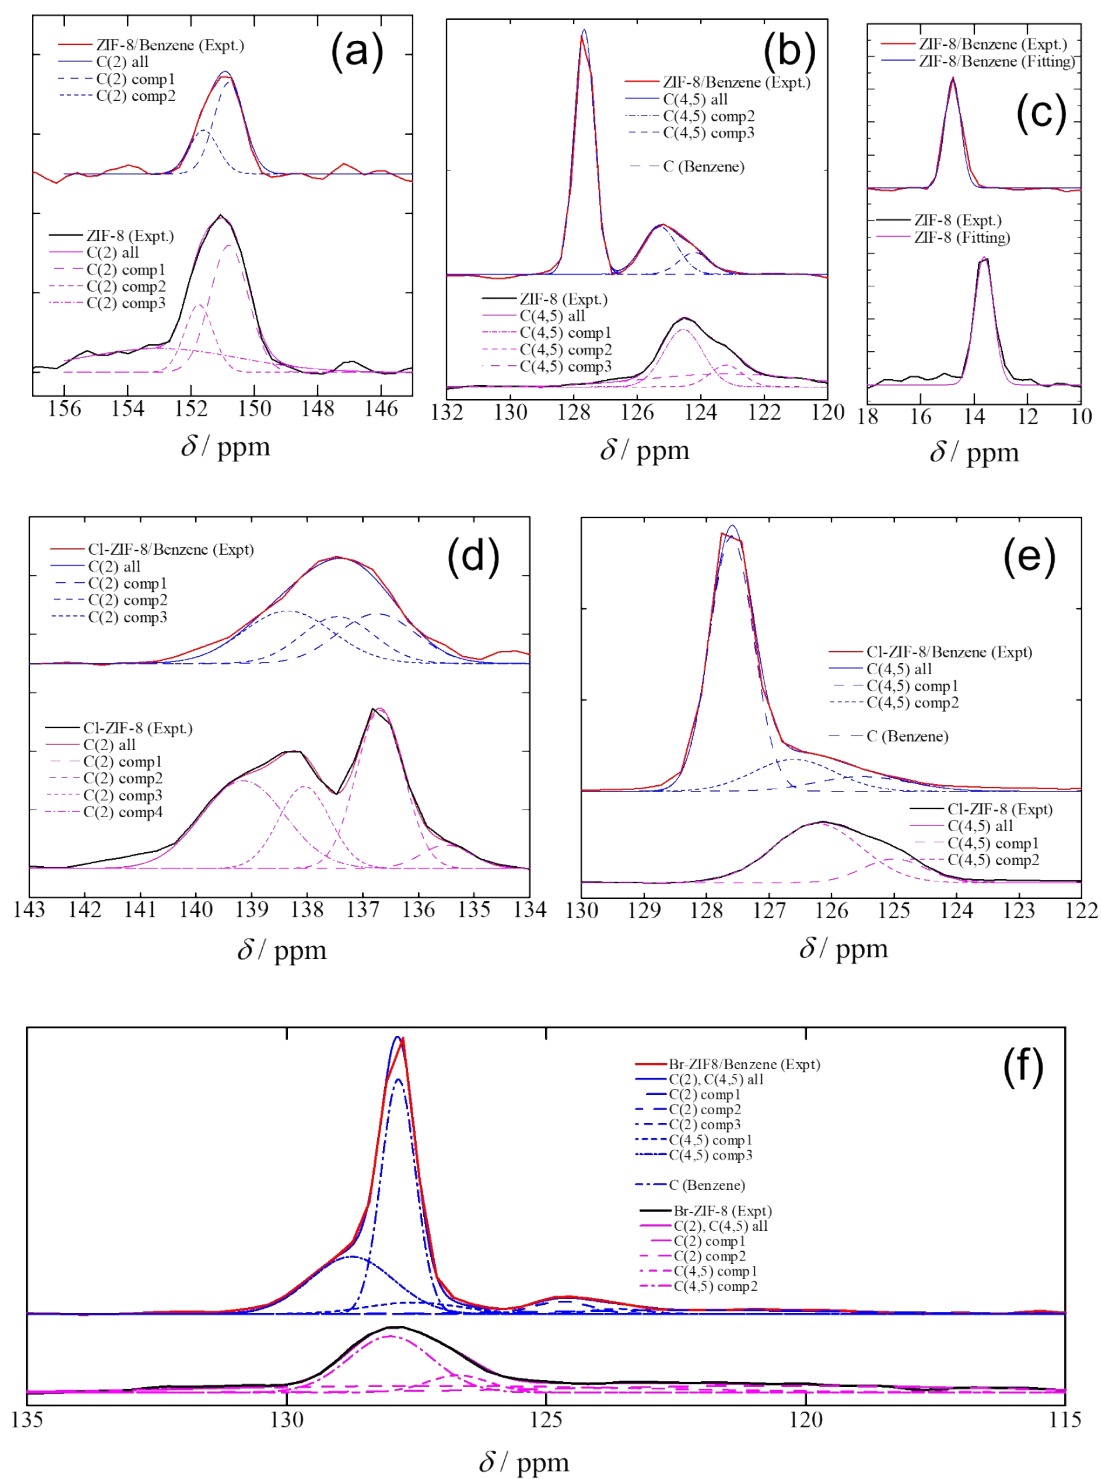

Figure S11. The results of the deconvolution of the resonance peaks using Gaussian functions: the quaternary carbon (a), the aromatic C-H carbons (b), and the methyl carbon (c) in ZIF-8, the quaternary carbon (d) and the aromatic C-H carbons (e) in Cl-ZIF-8, all carbons in Br-ZIF-8 (f).

## 2. Tables for Supplementary Information

Table S1. BET surface area and pore volume for ZIF-8 and X-ZIF-8.

|          | $a_{\text{BET}} / \text{m}^2 \text{g}^{-1}$ | $V_{\text{pore}} / \text{cm}^3 \text{g}^{-1}$ | $V_{\text{pore}} / \text{nm}^3 \text{(a pore)}$ |
|----------|---------------------------------------------|-----------------------------------------------|-------------------------------------------------|
| ZIF-8    | 1310                                        | 0.49                                          | 1.1                                             |
| Cl-ZIF-8 | 1052                                        | 0.45                                          | 1.2                                             |
| Br-ZIF-8 | 660                                         | 0.26                                          | 0.93                                            |

Table S2. Average particle size of ZIF-8 and X-ZIF-8.

|          | $d_{\text{ave}} / \text{nm}$ |
|----------|------------------------------|
| ZIF-8    | 470 ( $\pm 100$ )            |
| Cl-ZIF-8 | 1170 ( $\pm 200$ )           |
| Br-ZIF-8 | 640 ( $\pm 100$ )            |

$$r_{\text{ave}} = d_{\text{ave}}/2$$

Table S3. Desorption amount of benzene from ZIF-8 and X-ZIF-8 after saturation of adsorption.

|          | $w_{\text{initial}}/\text{mg}$ | $w_{\text{desorption}}/\text{mg}$ | $a_{\text{sat}}/\text{g g}^{-1}$ |
|----------|--------------------------------|-----------------------------------|----------------------------------|
| ZIF-8    | 6.13                           | 1.75                              | 0.29                             |
| Cl-ZIF-8 | 8.04                           | 1.12                              | 0.14                             |
| Br-ZIF-8 | 8.01                           | 0.66                              | 0.082                            |

Table S4. Results of the non-linear least-squares data fitting for Arrhenius plot of the adsorption rate constant.

|          | $E_a/R / 10^3 \text{K}^{-1}$ | SE in $E_a/R$             | $k_{0,\text{ads}}/10^{-5} \text{s}^{-1}$ | SE in $k_{0,\text{ads}}$  | $R^2$    |
|----------|------------------------------|---------------------------|------------------------------------------|---------------------------|----------|
| ZIF-8    | 3.2405848                    | $\pm 0.019345149$         | 6.8790369E+4                             | $\pm 24.708053$           | 0.939356 |
| Cl-ZIF-8 | 4.232818                     | $\pm 4.1879702\text{E-}6$ | 1.8667184E+6                             | $\pm 2.0093008\text{E-}4$ | 1        |
| Br-ZIF-8 | 5.5457234                    | $\pm 0.014130175$         | 2.2609365E+8                             | $\pm 41.95949$            | 0.989001 |

Table S5. Band assignment of IR spectrum of ZIF-8 before and after benzene adsorption.

| Band assignment <sup>a)</sup>                           | ZIF-8                                     |                                           | ZIF-8                               | ZIF-8/C <sub>6</sub> H <sub>6</sub> |
|---------------------------------------------------------|-------------------------------------------|-------------------------------------------|-------------------------------------|-------------------------------------|
|                                                         | $\tilde{\nu}_{Calc.}^{b)}/\text{cm}^{-1}$ | $\tilde{\nu}_{Expt.}^{b)}/\text{cm}^{-1}$ | $\tilde{\nu}_{Obs.}/\text{cm}^{-1}$ | $\tilde{\nu}_{Obs.}/\text{cm}^{-1}$ |
| Methyl in-plane bend (S)                                | 414                                       | 422                                       | 421                                 | 421                                 |
| Methyl stretch+ Ring puckering (S)                      | 667                                       | 692                                       | 693                                 | 692                                 |
| H <sub>ring</sub> symmetric out-of-plane bend (S)       | 734                                       | 757                                       | 758                                 | 757                                 |
| Ring in-plane bend (W/VW)                               | 940                                       | 951                                       | 953                                 | 952                                 |
| H <sub>methyl</sub> bend (S)                            | 981                                       | 995                                       | 995                                 | 994                                 |
| H <sub>ring</sub> scissor+H <sub>methyl</sub> bend (VW) | 1011                                      | 1038                                      | 1037                                | 1034                                |
| H <sub>ring</sub> wag (S)                               | 1141                                      | 1145                                      | 1146                                | 1145                                |
| Ring breathing (C-N symmetric stretch) (S)              | 1192                                      | 1175                                      | 1180                                | 1179                                |
| H <sub>methyl</sub> scissor(M)                          | 1308                                      | 1307                                      | 1310                                | 1309                                |
| Ring deformation (C-N asymmetric stretch) (S)           | 1369                                      | 1383                                      | 1382                                | 1379                                |
| H <sub>methyl</sub> bend (S)                            | 1403                                      | 1420                                      | 1426                                | 1424                                |
| C=C stretch+Cring-Cmethyl stretch (W)                   | 1442                                      | 1512                                      | 1510                                | 1509                                |
| Ring breathing (C=C stretch) (M)                        | 2951                                      | 2927                                      | 1584                                | 1579                                |
| H <sub>methyl</sub> symmetric stretch (W)               | 3013                                      | 2927                                      | 2929                                | 2926                                |
| H <sub>ring</sub> symmetric stretch (M)                 | 3180                                      | 3135                                      | 3134                                | 3132                                |

a) Ref. [S1]

b) Ref. [S2]

Table S6. Band assignment of IR spectrum of Cl-ZIF-8 before and after benzene adsorption.

| Band assignment                                           | Cl-ZIF-8                            | Cl-ZIF-8/C <sub>6</sub> H <sub>6</sub> |
|-----------------------------------------------------------|-------------------------------------|----------------------------------------|
|                                                           | $\tilde{\nu}_{Obs.}/\text{cm}^{-1}$ | $\tilde{\nu}_{Obs.}/\text{cm}^{-1}$    |
| Methyl in-plane bend (S)                                  | 410                                 | 410                                    |
| Methyl stretch + Ring puckering (S)                       | 683                                 | 682                                    |
| H <sub>ring</sub> symmetric out-of-plane bend (S)         | 749                                 | 750                                    |
| H <sub>ring</sub> scissor + H <sub>methyl</sub> bend (VW) | 1024                                | 1026                                   |
| H <sub>ring</sub> wag (S)                                 | 1137                                | 1136                                   |
| Ring breathing (C-N symmetric stretch) (S)                | 1164                                | 1165                                   |
| H <sub>ring</sub> wag (M)                                 | 1312                                | 1312                                   |
| Ring deformation (C-N asymmetric stretch) (S)             | 1371                                | 1370                                   |
| H <sub>methyl</sub> bend (S)                              | 1454                                | 1449                                   |
| C=C stretch+Cring-Cmethyl stretch (W)                     | 1507                                | 1507                                   |
| H <sub>ring</sub> symmetric stretch (M)                   | 3127                                | 3125                                   |
| H <sub>ring</sub> symmetric stretch (M)                   | 3146                                | 3144                                   |

Table S7. Band assignment of IR spectrum of Br-ZIF-8 before and after benzene adsorption.

| Band assignment                                   | Br-ZIF-8                     | Br-ZIF-8/C <sub>6</sub> H <sub>6</sub> |
|---------------------------------------------------|------------------------------|----------------------------------------|
|                                                   | $\tilde{\nu}_{Obs./cm^{-1}}$ | $\tilde{\nu}_{Obs./cm^{-1}}$           |
| Ring puckering (S)                                | 675                          | 672                                    |
| H <sub>ring</sub> symmetric out-of-plane bend (S) | 749                          | 748                                    |
| H <sub>ring</sub> symmetric out-of-plane bend (S) | 834                          | 834                                    |
| H <sub>ring</sub> symmetric out-of-plane bend (S) | 952                          | 951                                    |
| H <sub>ring</sub> symmetric out-of-plane bend (S) | 976                          | 976                                    |
| H <sub>ring</sub> wag (S)                         | 1133                         | 1132                                   |
| H <sub>ring</sub> wag (M)                         | 1161                         | 1160                                   |
| Ring deformation (C-N asymmetric stretch) (S)     | 1352                         | 1351                                   |
| H <sub>ring</sub> symmetric in-of-plane bend (W)  | 1440                         | 1437                                   |
| C=C stretch (W)                                   | 1576                         | 1576                                   |
| H <sub>ring</sub> symmetric stretch (M)           | 3125                         | 3125                                   |
| H <sub>ring</sub> symmetric stretch (M)           | 3144                         | 3144                                   |

Table S8. Band assignment of IR spectrum of benzene in bulk liquid and in X-ZIF-8.

| Mode <sup>a,b)</sup> | Band        | $\tilde{\nu}_{Obs./cm^{-1}}$ |       |          |          |
|----------------------|-------------|------------------------------|-------|----------|----------|
|                      |             | Bulk (liquid)                | ZIF-8 | Cl-ZIF-8 | Br-ZIF-8 |
| $\nu_{11}$           | C-H bend    | 673                          | 672   | 670      | 672      |
| $\nu_{18}$           | C-C stretch | 1035                         | 1034  | 1026     | 1034     |
| $\nu_9$              | C-H bend    | 1176                         | 1179  | 1165     | ----     |
| $\nu_{14}$           | C-C stretch | 1309                         | 1309  | 1312     | ----     |
| $\nu_{19}$           | C-H bend    | 1479                         | 1478  | 1478     | 1478     |
| $\nu_8$              | C-C stretch | 1586                         | 1579  | 1577     | 1576     |
| $\nu_7$              | C-H stretch | 3035                         | 3034  | 3034     | 3033     |
| $\nu_{20}$           | C-H stretch | 3071                         | 3070  | 3070     | 3069     |
| $\nu_2$              | C-H stretch | 3091                         | 3089  | 3090     | 3088     |

a) Ref. [S3]

b) Ref. [S4]



Table S9. The parameters characterizing the  $^{13}\text{C}$  NMR resonance lines in ZIF-8 and ZIF-8/ $\text{C}_6\text{H}_6$ .

|                | ZIF-8          |                |           | ZIF-8/ $\text{C}_6\text{H}_6$ |                |           |
|----------------|----------------|----------------|-----------|-------------------------------|----------------|-----------|
|                | $\delta$ / ppm | $\sigma$ / ppm | Intensity | $\delta$ / ppm                | $\sigma$ / ppm | Intensity |
| Me             | 13.63          | 0.35           | 3.9       | 14.8                          | 0.3            | 3.3       |
| Imidazole ring |                |                |           |                               |                |           |
| C(2)_comp1     | 150.8          | 0.6            | 1.6       | 150.8                         | 0.48           | 1.15      |
| C(2)_comp2     | 151.75         | 0.45           | 0.85      | 151.6                         | 0.45           | 0.55      |
| C(2)_comp3     | 153            | 2.5            | 0.3       | ----                          | ----           | ----      |
| C(4,5)_comp1   | 123.2          | 2.5            | 0.6       | ----                          | ----           | ----      |
| C(4,5)_comp2   | 123.2          | 0.52           | 1         | 124.2                         | 0.49           | 1         |
| C(4,5)_comp3   | 124.55         | 0.62           | 2.65      | 125.3                         | 0.55           | 2.2       |
| Benzene        | ----           | ----           | ----      | 127.67                        | 0.32           | 11.3      |

Table S10. The parameters characterizing the  $^{13}\text{C}$  NMR resonance lines in Cl-ZIF-8 and Cl-ZIF-8/ $\text{C}_6\text{H}_6$ .

|              | Cl-ZIF-8       |                |           | Cl-ZIF-8/ $\text{C}_6\text{H}_6$ |                |           |
|--------------|----------------|----------------|-----------|----------------------------------|----------------|-----------|
|              | $\delta$ / ppm | $\sigma$ / ppm | Intensity | $\delta$ / ppm                   | $\sigma$ / ppm | Intensity |
| C(2)_comp1   | 135.5          | 0.45           | 0.4       | 136.75                           | 0.7            | 0.85      |
| C(2)_comp2   | 136.69         | 0.43           | 2.7       | 137.45                           | 0.65           | 0.8       |
| C(2)_comp3   | 138.05         | 0.46           | 1.4       | 138.35                           | 0.8            | 0.9       |
| C(2)_comp4   | 139.15         | 0.75           | 1.5       | ----                             | ----           | ----      |
| C(4,5)_comp1 | 125            | 0.5            | 2.6       | 125.5                            | 0.75           | 1.6       |
| C(4,5)_comp2 | 126.23         | 0.7            | 6.45      | 126.6                            | 0.65           | 3.5       |
| Benzene      | ----           | ----           | ----      | 127.6                            | 0.35           | 28        |

Table S11. The parameters characterizing the  $^{13}\text{C}$  NMR resonance lines in Br-ZIF-8 and Br-ZIF-8/ $\text{C}_6\text{H}_6$ .

|              | Br-ZIF-8       |                |           | Br-ZIF-8/ $\text{C}_6\text{H}_6$ |                |           |
|--------------|----------------|----------------|-----------|----------------------------------|----------------|-----------|
|              | $\delta$ / ppm | $\sigma$ / ppm | Intensity | $\delta$ / ppm                   | $\sigma$ / ppm | Intensity |
| C(2)_comp1   | 120.5          | 4.0            | 0.5       | 122                              | 3              | 0.3       |
| C(2)_comp2   | 127.2          | 4.0            | 0.5       | 124.7                            | 0.55           | 0.98      |
| C(2)_comp3   | ----           | ----           | ----      | 123.63                           | 0.55           | 0.4       |
| C(4,5)_comp1 | 126.7          | 0.6            | 1.3       | 127.55                           | 0.9            | 0.9       |
| C(4,5)_comp2 | 128            | 0.8            | 4.3       | 128.75                           | 0.8            | 4.4       |
| Benzene      | ----           | ----           | ----      | 127.85                           | 0.33           | 17.5      |

### 3. Evaluation of activation entropy of benzene trapped by 6-membered ring aperture

In order to evaluate the activation entropy, at the first approximation, we accounted for the decrease in the degree of freedom when benzene molecule was trapped on the 6-membered ring aperture from the vapor phase. In this process, benzene molecules lose the degree of freedom of translation and rotational motions. In the 6-membered ring aperture, the interaction between a benzene molecule and the 2-imidazolate linkers lowers the frequency of the flipping motion of the linker moiety, resulting in the increase in degree of freedom in the vibrational excitation at a constant temperature. The orientational disorder of the linker moiety will also contribute to the entropy due to the configurations. Furthermore, in ZIF-8, the degree of freedom in the methyl rotation contributes to the molar entropy. Taking account of the molecular partition functions on translational, rotational, and vibrational motions, we evaluated the contributions to the molar entropy from these motional modes [S5].

For the three-dimensional translational motion of benzene, molar entropy,  $S_m^T$ , is given by the Sackur-Tetrode equation as follows;

$$S_m^T = R \ln \frac{kT e^{5/2}}{p \Lambda^3}$$

where  $\Lambda = h/(2\pi mkT)^{1/2}$  that is the thermal wavelength,  $p$  is the vapor pressure at temperature,  $T$ . For bulk benzene, the vapor pressure is evaluated to be  $1.579 \times 10^5$  Pa at 303 K using the Antoine equation [S6]. This equation provides  $160 \text{ JK}^{-1} \text{ mol}^{-1}$  at 303 K as a molar entropy of bulk benzene.

For rotational motion, molar entropy,  $S_m^R$ , is calculated from the molecular partition function,  $q_R$ , through the following relation:

$$S_m^R = R(1 + \ln q_R).$$

Assuming a benzene molecule as a symmetric rigid rotor, the molecular partition function of the rotational motion is given by

$$q_R = \frac{1}{\sigma} \left( \frac{kT}{hc} \right)^{3/2} \left( \frac{\pi}{\tilde{A}^2 \tilde{C}} \right)^{1/2}$$

where  $\tilde{A}$  and  $\tilde{C}$  are rotational constants for the molecular rotation around the  $C_2$ - and the  $C_6$ -symmetry axes, respectively. They are represented by

$$\tilde{A} = \frac{\hbar}{4\pi c I_{\perp}}$$

and

$$\tilde{C} = \frac{\hbar}{4\pi c I_{\parallel}}$$

where  $I_{\perp}$  and  $I_{\parallel}$  are moment of inertia of benzene molecule around the  $C_2$ - and  $C_6$ -symmetry axes, respectively. The symmetry number,  $\sigma$ , is 12 for benzene. This equation provides  $82.7 \text{ JK}^{-1} \text{ mol}^{-1}$  at 303 K for isotropic rotation of bulk benzene. The contributions of the molar entropy of rotation around the  $C_6$ - and  $C_2$ -

symmetry axes are represented, respectively, by the following partition functions:

$$q_R^{C_6} = \frac{1}{\sigma} \left( \frac{kT}{hc} \right)^{1/2} \left( \frac{\pi}{A^2} \right)^{1/2}$$

and

$$q_R^{C_2} = \frac{1}{\sigma} \left( \frac{kT}{hc} \right) \left( \frac{\pi}{A^2} \right)^{1/2}.$$

At 303 K, these equations give a molar entropy of 18.9 JK<sup>-1</sup> mol<sup>-1</sup> for uniaxial rotation around a C<sub>6</sub>-symmetry axis and of 63.8 JK<sup>-1</sup> mol<sup>-1</sup> for rotation around two C<sub>2</sub>-symmetry axes.

The methyl group can be treated as a symmetric rigid rotor, and the molecular partition function of the uniaxial C<sub>3</sub>-symmetry rotational motion is given by

$$q_R = \frac{T}{\sigma \theta_{R, CH_3}}$$

where  $\theta_{R, CH_3}$  is the rotational temperature of a methyl group, and is given by  $hc\tilde{B}/k$  using a rotational constant,  $\tilde{B}$ , for the rotation around a C<sub>3</sub>-symmetry axis. The  $\sigma$  value is 3 for the methyl group.

For the vibrational motion, a molar entropy,  $S_m^V$ , is calculated using the following relation;

$$S_m^V = R \left\{ \frac{\theta_V/T}{e^{\theta_V/T} - 1} - \ln \left( 1 - e^{-\theta_V/T} \right) \right\}$$

where  $\theta_V$  is the characteristic vibrational temperature, and is given by  $hc\tilde{\nu}/k$ . The frequencies of the linker flipping have been reported to be 0.58 THz in guest-free ZIF-8 [S7] and 0.053 THz in ZIF-8/benzene (6 molecules per pore) [S8]. The contribution of the molar entropy from the torsional vibration of an imidazolate linker is evaluated for these vibrational frequencies as a function of temperature, increasing the entropy by 20 JK<sup>-1</sup> mol<sup>-1</sup> for a linker at 303 K.

#### 4. <sup>13</sup>C-<sup>14</sup>N and <sup>13</sup>C-<sup>79/81</sup>Br residual dipolar splitting

The <sup>13</sup>C-X ( $S > 1/2$ ) residual dipolar splitting depends on the resonance frequency of X nuclei,  $Z_S$ , the X quadrupole coupling constant,  $\chi (= e^2 q_{zz} Q/h)$ , the <sup>13</sup>C-X dipolar interaction,  $D$ , and the orientation of the <sup>13</sup>C-X vector with respect to the EFG principal axis of X nuclei, which is defined by a pair of azimuth  $\alpha$  and elevation angle  $\beta$  [S9-S12]. The resonance frequency,  $\nu_m$ , is shifted by the <sup>13</sup>C-X residual dipolar interaction and is given by

$$\nu_m = \frac{3\chi D [S(S+1) - 3m^2]}{20Z_S [S(2S-1)]} f(\alpha, \beta)$$

where  $f(\alpha, \beta) = 3\cos^2 \beta - 1 + \eta \sin^2 \beta \cos 2\alpha$ . The value of  $f(\alpha, \beta)$  is distributed from -1 to 2 when the asymmetric parameter of the electric field gradient tensor is zero ( $\eta = 0$ ). The heteronuclear dipolar interaction,  $D$ , is represented by

$$D = \left( \frac{\mu_0}{4\pi} \right) \frac{\gamma_I \gamma_S \hbar}{4\pi^2 r_{IS}^3}$$

for a *I-S* nuclear spin pair with the internuclear distance of  $r_{IS}$ . The  $^{13}\text{C-X}$  residual dipolar splitting,  $\Delta$ , of the resonance peak is given by  $\nu_m - \nu'_m$ . For  $^{13}\text{C-}^{14}\text{N}$  pair,  $S = 1$  and  $\Delta = \nu_0 - \nu_{\pm 1}$ . For  $^{13}\text{C-}^{79/81}\text{Br}$  pair,  $S = 3/2$  and  $\Delta = \nu_{\pm 1/2} - \nu_{\pm 3/2}$ .

The typical values of the  $^{14}\text{N}$  quadrupole coupling constant for imidazole coordinating to zinc are distributed from 1.9 to 2.8 MHz for imino nitrogen and from 1.5 to 1.8 MHz for amino nitrogen [S13]. Using  $\chi \sim 2.8$  MHz and  $r_{\text{CN}} = 1.377$  Å, the maximum splitting caused by the  $^{13}\text{C-}^{14}\text{N}$  residual dipolar interaction is estimated to be  $< 0.2$  ppm under the external magnetic field of 14.7 T, which is smaller than the full width at a half maximum of the observed peak (the  $\sigma$  values in Table S8 are distributed in the range from 0.45 ppm to 2.5 ppm for ZIF-8 and ZIF-8/ $\text{C}_6\text{H}_6$ ).

On the other hand, in the case of  $^{13}\text{C-}^{79/81}\text{Br}$ , we referred to *p*-dibromotetrafluorobenzene ( $\text{C}_6\text{F}_4\text{Br}_2$ ) for the typical compound with the covalent bond between aromatic carbon and bromine atoms. In this compound, the  $^{79/81}\text{Br}$  quadrupole coupling constants are  $\sim 515$  MHz for  $^{81}\text{Br}$  nuclei and  $\sim 617$  MHz for  $^{79}\text{Br}$  nuclei [S14]. These values are regarded as the typical values of the  $^{79/81}\text{Br}$  quadrupole coupling constant for bromine atom covalently bonded to the benzyl group. In addition, using  $r_{\text{CBr}} = 1.872$  Å in Br-ZIF-8, the maximum splitting is estimated at 15 ppm for  $^{81}\text{Br}$  and at 19 ppm for  $^{79}\text{Br}$  under the external magnetic field of 14.7 T. These values are reasonable for the observed linewidth for the quaternary carbon of Br-ZIF-8.

## References

- [S1] B. Xu, D. Xie, Y. Mei, Z. Kang, R. Wang, D. Sun, *Phys. Chem. Chem. Phys.*, 2017, **19**, 27178-27183.
- [S2] C. Wu, D. Xie, Y. Mei, K. M. Poduska, D. Li, B. Xu, D. Sun, *Phys. Chem. Chem. Phys.*, 2019, **21**, 17571-17577.
- [S3] M. A. Palafox, Scaling factors for the prediction of vibrational spectra. I. Benzene molecule. *Inter. J. Quant. Chem.*, 2000, **77**, 661-684.
- [S4] S. Brodersen, A. Langseth, *Mat. Fys. Skr. Dan. Vid. Selsk.*, 1956, **1**, 1.
- [S5] P. Atkins, J. de Paula, *Atkins' Physical chemistry, tenth edition*; Oxford University Press: Oxford, U.K., **2014**; pp. 636–643.
- [S6] C.B. Willingham, W. J. Taylor, J. M. Pignocco, F. D. Rossini, Vapor pressures and boiling points of some paraffin, alkylcyclopentane, alkylcyclohexane, and alkylbenzene hydrocarbons, *J. Res. Natl. Bur. Stan.*, 1945, **35**, 3, 219-217.
- [S7] T. Ueda, M. Nakai, T. Yamatani, A solid-state  $^1\text{H}$ -NMR study of the dynamic structure of ZIF-8 and its role in the adsorption of bulky molecules, *Adsorption*, 2017, **23**, 887–901.

- [S8] D. I. Kolokolov, A. G. Stepanov, H. Jovic, Mobility of the 2-Methylimidazolate Linkers in ZIF-8 Probed by  $^2\text{H}$  NMR: Saloon Doors for the Guests, *J. Phys. Chem. C*, 2015, **119**, 27512–27520.
- [S9] R. K. Harris, A. C. Olivieri, Quadrupolar Effects Transferred to Spin-1/2 Magic-Angle Spinning Spectra of Solids, *Prog Nucl Magn Reson Spectrosc*, 1992, **24**, 435-456.
- [S10] A. C. Olivieri, L. Frydman, L. E. Diaz, A Simple Approach for Relating Molecular and Structural Information to the Dipolar Coupling  $^{13}\text{C}$ - $^{14}\text{N}$  in CPMAS NMR, *J. Magn. Reson.*, 1987, **75**, 50-62.
- [S11] A. C. Olivieri, Quadrupolar Effects in the CPMAS NMR Spectra of Spin-1/2 Nuclei, *J. Magn. Reson.*, 1989, **81**, 201-205.
- [S12] K. Eichele, M. D. Lumsden, R. E. Wasylshen, Nitrogen-14 Coupled Dipolar-Chemical Shift  $^{13}\text{C}$  NMR Spectra of the Amide Fragment of Peptides in the Solid State, *J. Phys. Chem.*, 1993, **97**, 8909-8916.
- [S13] C. I. H. Ashby, C. P. Cheng, T. L. Brown,  $^{14}\text{N}$  Nuclear Quadrupole Resonance Spectra of Coordinated Imidazole, *J. Am. Chem. Soc.*, 1978, **100**, 6057–6063.
- [S14] P. C. Cerreia Vioglio, P. M. J. Szell, M. R. Chierotti, R. Gobetto, D. L. Bryce,  $^{79/81}\text{Br}$  Nuclear Quadrupole Resonance Spectroscopic Characterization of Halogen Bonds in Supramolecular Assemblies, *Chem. Sci.*, 2018, **9**, 4555.
